# 1 Identifying robust strategies for assisted migration given risks 2 and uncertainties in a stochastic metacommunity

3

4 Gregory A. Backus<sup>1\*</sup>, Marissa L. Baskett<sup>1</sup>

5 1: Department of Environmental Science and Policy, University of California, Davis

6 \*: Corresponding author: [gabackus@ucdavis.edu](mailto:gabackus@ucdavis.edu)

7

## 8 **Abstract**

9 Assisted migration is the translocation of species beyond their historical range to more suitable  
10 locations given future climate change. This conservation approach poses risks of establishment  
11 failure because of uncertainty in decision making, climate, and interactions with the recipient  
12 ecological community. To quantify the risks and benefits of assisted migration under different  
13 management decisions, we built a stochastic metacommunity model to simulate several species  
14 reproducing, dispersing, and competing on a temperature gradient as temperature increases  
15 over time. Without assisted migration, species were vulnerable to climate change if they had a  
16 low population sizes, short dispersal, and strong poleward competition. When relocating  
17 species that exemplified these traits assisted migration increases the long-term persistence of  
18 the species most when relocating a fraction of the donor population, even if the remaining  
19 population was very small or rapidly declining. Especially when it is difficult to identify a species'  
20 optimal climate, leaving behind a fraction of the population could be a robust approach,  
21 allowing managers to repeat assisted migration in case they move the species at the wrong  
22 place and wrong time. Assisted migration was most beneficial to species with low dispersal  
23 ability and least beneficial to species with narrow thermal tolerances, for which assisted  
24 migration increased extinction risk in almost all situations. Relocation did not affect the survival  
25 of non-target species, suggesting that competitive interactions alone were unlikely cause  
26 invasions from assisted migration.

## 27 **Keywords**

28 managed relocation, community ecology, climate change, stochastic model, translocation,  
29 dispersal

30

31

32

## 33 **Introduction**

34           Global biodiversity is expected to decline at accelerated rates with projected climate  
35 change (Urban 2015). Among the species that are most at risk of extinction are those with  
36 limited dispersal, narrow ranges, narrow climate tolerance, and low population sizes (Pearson  
37 2006; Parmesan 2006; Tewksbury et al. 2008). Moreover, competition and other community  
38 interactions could increase extinction risk, as negative interactions can limit the dispersal of  
39 species that might be otherwise adequate dispersers (Davis et al. 1998; Gilman et al. 2010;  
40 Urban et al. 2012). Many of these climate-threatened species face a high likelihood of  
41 extinction without human intervention, prompting scientists and managers to consider a  
42 variety of novel approaches to conservation (Heller & Zavaleta 2009). Among these approaches  
43 is assisted migration (AM), in which managers relocate individuals from a threatened  
44 population to a location outside their historical range expected to be more suitable under  
45 projected future climates (McLachlan et al. 2007; Schwartz et al. 2012). By allowing these  
46 species to reach favorable climates in densities that they would not be able to reach on their  
47 own, AM might improve a species' chance of persistence in ways that traditional conservation  
48 strategies, such as direct restoration, cannot (McLachlan et al. 2007; Lawler & Olden 2011).

49           Moving a species into a novel ecosystem incurs many risks (Mueller & Hellmann 2008;  
50 Ricciardi & Simberloff 2009; Hewitt et al. 2011). Most frequently raised is the risk that relocated  
51 species might become invasive (Hewitt et al. 2011). For example, relocating one species would  
52 artificially increase its effective dispersal, creating higher variation in metacommunity dispersal  
53 ability and impeding other species' ability to track of climate change (Urban et al. 2012).

54 Another risk is the possibility that a relocated population could fail to establish (Chauvenet et  
55 al. 2013; Plein et al. 2016). Establishment failure could further contribute to the extinction of  
56 species that are already threatened by climate change by reducing the population size and  
57 genetic diversity of the species while also incurring an economic cost to the limited available  
58 resources for conservation (McDonald-Madden et al. 2008). The challenges inherent to  
59 translocation are evident in the low-to-intermediate success of previous conservation-based  
60 translocations within species' historical ranges across a wide range of taxa (Fischer &  
61 Lindenmayer 2000; Godefroid et al. 2011; Bellis et al. 2019). The risk of establishment failure  
62 depends, in part, on uncertainties that lead managers to relocate a species into the wrong place  
63 at the wrong time, especially if there are narrow conditions under which a species can persist.  
64 One source of uncertainty that has led to translocation failures is environmental stochasticity  
65 (Wolf et al. 1996), which will likely increase with climate change (Vasseur et al. 2014).  
66 Additional uncertainty stems from the difficulty in quantifying and differentiating between the  
67 abiotic and biotic drivers of species' ranges (Case et al. 2005), which are likely to be increasingly  
68 uncertain with climate change (Boiffin et al. 2017). Given these uncertainties, a key  
69 management challenge is developing robust approaches over a range of conditions (Regan et  
70 al. 2005; McDonald-Madden et al. 2008) for the array of decisions involved in AM. This involves  
71 deciding which species are vulnerable to climate-threatened extinction, which species will likely  
72 benefit from AM, when and where to move a species, and how many individuals to move  
73 (McDonald-Madden et al. 2011; Rout et al. 2013).

74 Despite a lack of consensus among the scientific community and the public about the  
75 benefits and risks of AM (Hewitt et al. 2011; Javeline et al. 2015; St-Laurent et al. 2018), several

76 species are already being relocated (McLachlan et al. 2007; Seddon et al. 2015). Scientific  
77 guidance for AM endeavors is available from existing AM decision-making frameworks, which  
78 typically focus on optimizing a species' persistence under climate change using single-species  
79 models (McDonald-Madden et al. 2008; Rout et al. 2013; Kling et al. 2016). Extending these to a  
80 multispecies framework is a crucial next step to account for the species interactions that give  
81 rise to the risk of invasiveness and uncertainty in the drivers of species ranges. In this paper, we  
82 quantify the benefits and risks of AM given species interactions, multiple sources of  
83 uncertainty, and an array of management decisions. We built a stochastic metacommunity  
84 model to simulate competing species undergoing climate change to estimate which species  
85 were vulnerable to extinction, which species were likely to benefit from AM, and what fraction  
86 of the population to relocate. Because managers will have limited knowledge of a species'  
87 optimal climate (a reducible uncertainty), we simulated relocation with uncertainty in  
88 estimating of species' thermal optima. By repeating these simulations under different levels of  
89 environmental stochasticity (an irreducible uncertainty), we identified characteristics of  
90 successful AM approaches that were robust over a wide variety of uncertainty scenarios.

91

## 92 **Methods**

### 93 *Model overview*

94 To compare assisted migration (AM) strategies, we modeled metacommunity dynamics  
95 of multiple species competing on a one-dimensional linear temperature gradient subjected to  
96 climate change, analogous to a previous model by Urban et al. (2012) with environmental

97 stochasticity. For simplicity, all species in this metacommunity are annuals competing over the  
98 same resources at the same trophic level. The model cycles through the processes of  
99 reproduction, dispersal, and competition, all with demographic stochasticity, in each time step  
100 (Fig. 1). Each species  $i$  has a unique dispersal distance ( $\gamma_i$ ), thermal optimum ( $z_i$ ), thermal  
101 tolerance breadth ( $\sigma_i$ ), and a reproductive strength parameter ( $r_i$ ) that scales the birth rate to  
102 create a specialist/generalist trade-off (Levins 1968). We simulate AM by selecting one target  
103 species and relocating a fraction of its total population toward the leading edge each time the  
104 population falls below a threshold population size. We compared outcomes when relocating  
105 different target species with different fractions of the population into different locations and  
106 quantified how these decisions affected species' persistence and community diversity.

#### 107 *Population dynamics*

108 Each species  $i$  has a local population size of  $n_i(x, t)$  individuals in discrete patch  $x$  and a  
109 total metapopulation size over all space  $X$  of  $N_i(t) = \sum_{x \in X} n_i(x, t)$  at discrete time  $t$ . First, all  
110 individuals reproduce (Fig. 1a) with a reproductive output  $b_i(T(x, t))$  that depends on local  
111 temperature  $T(x, t)$ . Temperature-dependence is skew-normal, given skewness constant  $\lambda$ ,  
112 where highest values around the thermal optimum  $z_i$  and a sharp decrease above  $z_i$  (Norberg  
113 2004). Thermal tolerance breadth  $\sigma_i$  and reproductive strength  $r_i$  determine the breadth and  
114 height of the temperature-dependence. Altogether,  $b_i(T(x, t))$  is

$$b_i(T(x, t)) = \exp\left(r_i \left\{ \exp\left[-\left(\frac{T(x, t) - z_i}{\sigma_i}\right)^2\right] \cdot \left[1 + \operatorname{erf}\left(\lambda \frac{T(x, t) - z_i}{\sigma_i}\right)\right] - 1\right\}\right) \quad (1)$$

115 (following Urban et al. 2012). To incorporate demographic stochasticity, the number of  
 116 propagules produced by species  $i$  in patch  $x$  is a Poisson random variable with mean equal to  
 117 the reproductive output,  $n_i^*(x, t) \sim \text{Poisson}(n_i(x, t)b_i(T(x, t)))$  (Melbourne & Hastings 2008).

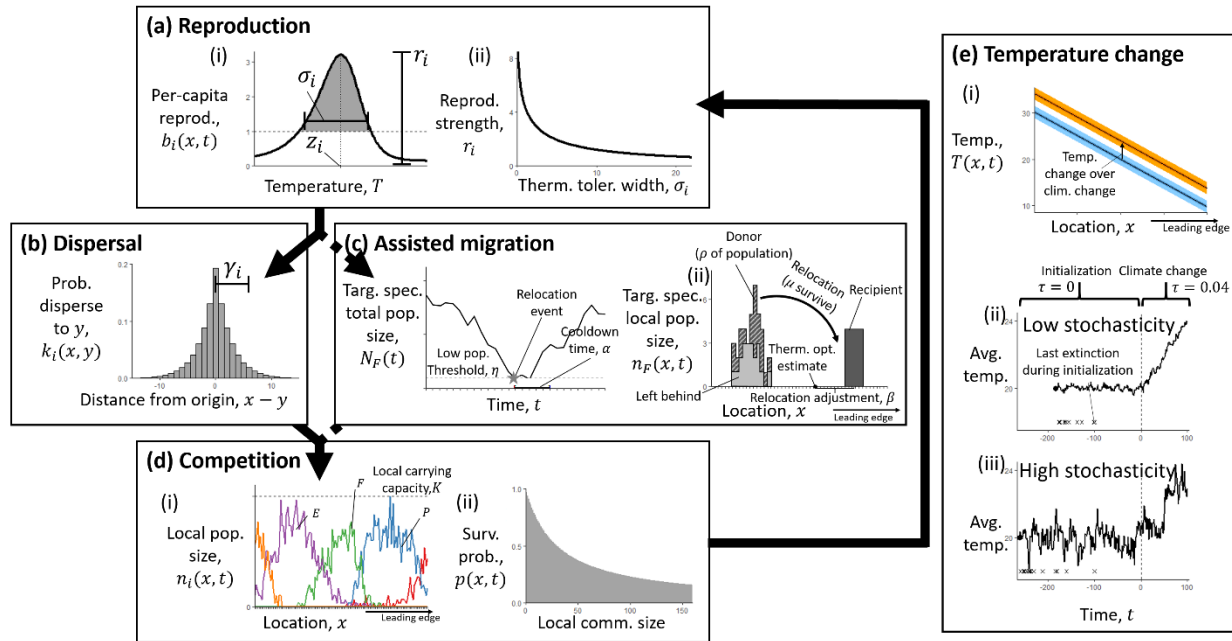

**Figure 1:** During each time step of the model, all extant species cycle through (a) reproduction, (b) dispersal, and (d) competition before (e) the temperature changes and the next time step continues. The target species also experiences (c) assisted migration during certain time steps. (a.i) Per capita reproductive output  $b_i(T(x, t))$  is skew-normal, dependent on temperature  $T(x, t)$ . This function is shaped by species' thermal optimum  $z_i$  and thermal tolerance breadth  $\sigma_i$ . (a.ii) Reproductive strength  $r_i$  scales the total reproductive output so that species with narrow  $\sigma_i$  (specialists) have higher reproduction and species with broad  $\sigma_i$  (generalists) have lower reproduction. (b) The dispersal kernel is a long-tailed "double geometric" distribution with a mean dispersal distance  $\gamma_i$ . (c.i) Relocation occurs once the total population of target species  $F$  falls below a threshold  $\eta$ . To avoid repetition while  $F$  recovers, no relocations occur during a cool-down period following relocation  $\alpha$ . (c.ii) A fraction  $\rho$  of population  $F$  is removed from its original distribution and moved to a new location (only  $\mu$  survive)  $\beta$  patches beyond the leading edge. Remaining individuals disperse naturally. (d.i) All species compete over limited space, where each patch has a carrying capacity  $K$ . Here each line represents a different species. (d.ii) In each patch, individual survival probability  $p(x, t)$  decreases as the total community size increases. (e) Temperature changes stochastically over time. (e.i) Mean temperature decreases linearly with space. Over time, between  $t = 0$  (lower line) and  $t = 100$  (upper line), the temperature increases by 4°C. (e.ii-iii) Temperature variation over time depends on level of environmental stochasticity. Both examples have the same autocorrelation ( $\kappa$ ), but (ii) has a higher standard deviation ( $\psi$ ). The vertical dashed line designates when the model changes from the initialization phase (average temperature change ( $\tau = 0$ )) to the climate change phase ( $\tau = 0.04$ ). Climate change only occurs after a relatively stable metacommunity has been assembled, after 100 time steps have passed with no extinctions.

118 Next, each propagule disperses from its origin (Fig. 1b). We adapted the Laplace  
119 dispersal kernel (Neubert & Caswell 2000; Urban et al. 2012) to a discrete-space analog  
120 (Appendix S1). We define  $\gamma_i$  as the mean absolute distance (in patches) that species  $i$  moves

121 from its origin and let kernel parameter  $q_i = \frac{\gamma_i + 1 - \sqrt{\gamma_i^2 + 1}}{\gamma_i}$ . Thus, the probability of a propagule

122 from patch  $x$  moving to patch  $y$  is

$$k_i(x, y) = \left( \frac{q_i}{2 - q_i} \right) (1 - q_i)^{|x-y|}. \quad (2)$$

123 To incorporate demographic stochasticity, all propagules of species  $i$  disperse from patch  $x$   
124 throughout all space  $X$  with the random vector

125  $M_i(n_i(x, t), x, t) \sim \text{Multinomial}(n_i^*(x, t), k_i(x, X))$ , and the total metapopulation after dispersal

126 is  $n_i^{**}(X, t) = \sum_{x \in X} M_i(n_i(x, t), x, t)$ .

127 Lastly, dispersed propagules compete within each patch  $x$  given community-wide  
128 carrying capacity  $K$  (Fig. 1d). We assumed a variation on lottery competition (Sale 1978;  
129 Chesson & Warner 1981), where each individual has an equal probability of surviving,

$$p(x, y) = \left( 1 + \frac{\sum_{j=1}^S n_j^{**}(x, t)}{K} \right)^{-1}. \quad (3)$$

130 The total number of propagules of species  $i$  in patch  $x$  that survive after competition is a

131 binomial random variable  $n_i(x, t + 1) \sim \text{Binomial}(n_i^{**}(x, t), p(x, t))$  (Melbourne & Hastings

132 2008).

133

134 *Spatial structure*

135           Metacommunity dynamics occur across a one-dimensional, linear temperature gradient  
136 of  $L$  patches (Fig. 1e), representing a gradual latitudinal or sharp elevational change (Urban et  
137 al. 2012). We remove propagules that disperse outside of the spatial gradient. Because these  
138 absorbing boundary conditions could bias our analyses on the edges, we disregard the first  $\frac{L}{8}$   
139 patches on the poleward edge and the last  $\frac{3L}{8}$  patches on the equatorward edge when  
140 measuring species and community metrics.

141           Temperature changes each time step by mean  $\tau$  with autocorrelation  $\kappa$  and standard  
142 deviation  $\psi$  around white noise  $\omega(t)$ . The stochastic component of yearly temperature change  
143 is  $\epsilon(t + 1) = \kappa\epsilon(t) + \omega(t)\sqrt{1 + \kappa^2}$ , with the square root term to remove the effect of  
144 autocorrelation on the variance (Wichmann et al. 2005). Altogether, the temperature in patch  $x$   
145 changes over time as

$$T(x, t + 1) = T(x, t) + \tau + \psi\epsilon(t). \quad (4)$$

146 *Assisted migration*

147           AM focuses on a single target species (Fig. 1c), species  $F$ . We relocate species  $F$  if the  
148 total metapopulation size  $N_F(x, t)$  is below a threshold at the beginning of a time step. To avoid  
149 repeating AM before species  $F$  recovers, we only relocate if we did not previously relocate  
150 within the last  $\alpha$  time steps. After reproduction, we select a fraction of propagules  $\rho$  for AM,  
151 randomly chosen from throughout the species' range, while the remaining propagules are left  
152 behind to disperse naturally. From the propagules chosen for AM, only a proportion  $\mu$  of them



153 survive relocation, and those are relocated uniformly around a patch  $\beta$  spaces poleward of the  
154 patch that most closely matches the species' estimated thermal optimum.

155 We considered three methods of estimating the thermal optimum of species  $F$ . The  
156 perfect knowledge estimate is the exact value of the true thermal optimum  $z_F$ . The realized  
157 niche estimate is the temperature in the median patch of the target species' distribution at  $t =$   
158 0. The fundamental niche estimate measures species' limits without competition by simulating  
159 100 time steps with  $\tau = 0$  °C/year and only species  $F$ . This estimate is the temperature in the  
160 median patch of the resulting distribution.

#### 161 *Parameterization and implementation*

162 Simulations occurred on a temperature gradient with  $L = 512$  patches, where initial  
163 temperatures linearly varied over space from 9.78 °C to 30.22 °C. We considered two types of  
164 environments, defined by their stochasticity. Low-stochasticity environments had an annual  
165 temporal standard deviation of  $\psi = 0.1639$  °C, equal to the standard deviation of mean  
166 combined global land-surface air and sea-surface water temperature anomalies from 1880 to  
167 1979 (GISTEMP Team 2019; Lenssen et al. 2019), and high-stochasticity environments had four  
168 times that amount. Both had an annual temporal autocorrelation of  $\kappa = 0.767$ , also from  
169 temperature anomalies from 1880 to 1979. We used skewness constant  $\lambda = -2.7$  (Urban et al.  
170 2012) and carrying capacity  $K = 30$  individuals.

171

172

**Table 1:** Definitions of the symbols used in the model.

| Parameter                                      | Symbol               | Values                            | Units       |
|------------------------------------------------|----------------------|-----------------------------------|-------------|
| Total species                                  | $S$                  | 32                                | species     |
| Dispersal distance of species $i$              | $\gamma_i$           | Lognormal; mean=2.5, st. dev.=2.5 | patches     |
| Thermal optimum of species $i$                 | $z_i$                | Uniform; 9.78 to 30.22            | °C          |
| Thermal tolerance breadth of species $i$       | $\sigma_i$           | Lognormal; mean=5, st. dev.=5     | °C          |
| Reproductive strength of species $i$           | $r_i$                | Derived from $\sigma_i$           | -           |
| Skewness constant                              | $\lambda$            | -2.7                              | -           |
| Fraction of population relocated               | $\rho$               | 0, 0.05, 0.1, ..., 1              | -           |
| Assisted migration survival probability        | $\mu$                | 0.8                               | -           |
| Low population threshold                       | $\eta$               | 42                                | individuals |
| Cooldown time between relocations              | $\alpha$             | 5                                 | years       |
| Relocation adjustment (relative to optimum)    | $\beta$              | 10                                | patches     |
| Total patches                                  | $L$                  | 512                               | patches     |
| Patch carrying capacity                        | $K$                  | 30                                | Individuals |
| Mean annual temperature change                 | $\tau$               | 0.04                              | °C/year     |
| Annual temporal autocorrelation                | $\kappa$             | 0.767                             | -           |
| Annual temporal standard deviation             | $\psi$               | low=0.1639, high=0.6556           | °C          |
| Initial total population size of species $i$   | $N_i(0)$             | -                                 | individuals |
| Difference in thermal optimum with species $i$ | $z_{\text{diff},i}$  | -                                 | °C          |
| Inverse Simpson's index of region $W$          | $D_W$                | -                                 | -           |
| Measured temperature change                    | $c_T$                | -                                 | °C          |
| Measured SD in temperature                     | $s_T$                | -                                 | °C          |
| Deviation in thermal optimum estimate          | $z_{\text{est,dev}}$ | -                                 | °C          |

173 Before simulating climate change, we performed an initialization phase to assemble a  
174 metacommunity with multidecadal coexistence under background environmental stochasticity.  
175 First, we generated a pool of  $S = 32$  randomized species, each with unique dispersal distances  
176  $\gamma_i$ , thermal optima  $z_i$ , and thermal tolerance breadths  $\sigma_i$ , all randomly generated from default  
177 values in Urban et al. (2012) (Table 1). We numerically derived the reproductive strength  $r_i$   
178 from  $\sigma_i$ , such that each species had the same overall reproductive potential  $B = 5$  when  
179 integrating over temperature. This emulates a jack-of-all-trades-master-of-none trade-off  
180 (Levins 1968), so that species ranged from generalists (wide  $\sigma_i$ , low  $r_i$ ) to specialists (narrow  $\sigma_i$ ,  
181 high  $r_i$ ). We placed 25 individuals from each species into five adjacent patches that most closely  
182 matched each species' thermal optimum and iterated through the model with mean

183 temperature change  $\tau = 0$  °C/year until 100 time steps passed without any extinctions. The  
184 remaining communities set initial conditions for subsequent climate change simulations.

185         Next, we modeled metacommunity dynamics under climate change without AM to  
186 determine which characteristics related to species, communities, and environments could  
187 predict species' vulnerability when unmanaged. After generating  $2^{16}$  initialized communities  
188 under both low and high stochasticity, we iterated through 100 time steps with mean annual  
189 temperature change  $\tau = 0.04$  °C/year to reflect projected temperature changes under RCP8.5  
190 (Urban et al. 2012, IPCC 2014). From these no-AM simulations, we chose the low-population  
191 threshold for AM  $\eta = 42$ , high enough that relocation could occur before extinction but low  
192 enough that there were few false positives (Appendix S1).

193         Finally, we modeled metacommunity dynamics under climate change with AM to test  
194 the success of a suite of potential relocation decisions. We initialized 10000 metacommunities  
195 under both low and high stochasticity and chose several target species (species  $F$ ) that could be  
196 considered vulnerable to climate change, including: the species with the shortest dispersal, the  
197 species with the narrowest thermal tolerance breadth (specialists), the species with the closest  
198 (or lowest difference in thermal optimum with its) poleward neighbor, and the species with the  
199 lowest initial population size. For comparison, we also chose a randomly selected species. All  
200 target species were initially extant within an interior region of the temperature gradient,  $W \in$   
201  $[65,320]$ , ensuring that their thermal optimum would likely exist after climate change and that  
202 there was competitive pressure on both the trailing and leading edges. The species with closest  
203 thermal optimum below the target species was the poleward neighbor (species  $P$ ) and the  
204 closest species on the other side was the equatorward neighbor (species  $E$ ). We simulated each

205 combination of target species type, fraction relocated  $\rho$  from 0 to 1, and thermal optimum  
206 estimate while keeping consistent values for AM survival probability  $\mu = 0.8$ , cooldown time  
207  $\alpha = 5$ , and relocation adjustment  $\beta = 10$ .

208 To determine which ecological characteristics could best predict species' vulnerability to  
209 climate change, we ran random forest classifications (`randomForest` 4.6-14 package, R  
210 Version 3.5.1) on all simulations without AM (separately for low and high stochasticity). The  
211 dependent variable was the fate of a single random species (extinction/persistence) after  
212 climate change, and the independent variables were target species' thermal optimum ( $Z_F$ );  
213 difference in thermal optimum between target species and neighbors ( $Z_{diff,P}$ ,  $Z_{diff,E}$ ); target and  
214 neighbor species' dispersal ( $\gamma_F$ ,  $\gamma_P$ ,  $\gamma_E$ ); target and neighbor species' thermal tolerance  
215 breadths ( $\sigma_F$ ,  $\sigma_P$ ,  $\sigma_E$ ); target and neighbor species' initial population sizes ( $N_F(0)$ ,  $N_P(0)$ ,  
216  $N_E(0)$ ); inverse Simpson's diversity index of the initial community ( $D_W$ ); measured temperature  
217 change ( $c_T$ ); and measured standard deviation in temperature ( $s_T$ ). Because persistence was  
218 more common than extinction, we down-sampled for equal sample sizes. The unscaled  
219 permutation variable importance of each independent variable estimated how well these  
220 characteristics predicted vulnerability and partial dependence quantified the marginal effect of  
221 the characteristics on vulnerability.

222 To determine what types of species and communities are conducive to AM success  
223 (increased persistence likelihood with AM), we ran another set of random forest classifications.  
224 The dependent variable was the fate of the target species (extinction/persistence) and the  
225 independent variables were the same as above in addition to the deviation between the  
226 estimated and true thermal optimum ( $z_{est,dev}$ ). To focus on cases where target species

227 specifically benefited from AM, we only included simulations in which the target species went  
228 extinct without AM. To simplify analysis, we only considered simulations with fraction-moved  
229  $\rho = 0.5$ , shortest dispersers, and realized niche estimates.

230

## 231 **Results**

### 232 *Without AM*

233 Without assisted migration (AM), 91.3% of species persisted under climate change in  
234 low-stochasticity environments compared with 84.7% persistence under high stochasticity (Fig.  
235 2a-b). In both cases, persistence depended most strongly on a small number of characteristics  
236 based on random forest classifications (out-of bag error: 8.09% low stochasticity, 11.27% high  
237 stochasticity) (Fig. 2c-d, Appendix S2). Persistence was lowest when a species had low initial  
238 population sizes  $N_F(0)$ , short dispersal distances  $\gamma_F$ , and a close poleward neighbors  $z_{\text{diff},P}$ .  
239 Under low stochasticity, persistence depended on the thermal tolerance of the poleward  
240 neighbor  $\sigma_P$ , such that specialists (species with narrow thermal tolerance breadth) with  
241 specialists on their leading edge were less likely to persist than specialists with generalists on  
242 their leading edge (Appendix S2). Comparatively, dispersal and the measured standard  
243 deviation in temperature ( $s_T$ ) were more important for persistence under high stochasticity.  
244 Altogether, competition largely determined persistence under low stochasticity, whereas  
245 dispersal largely determined persistence under high stochasticity.

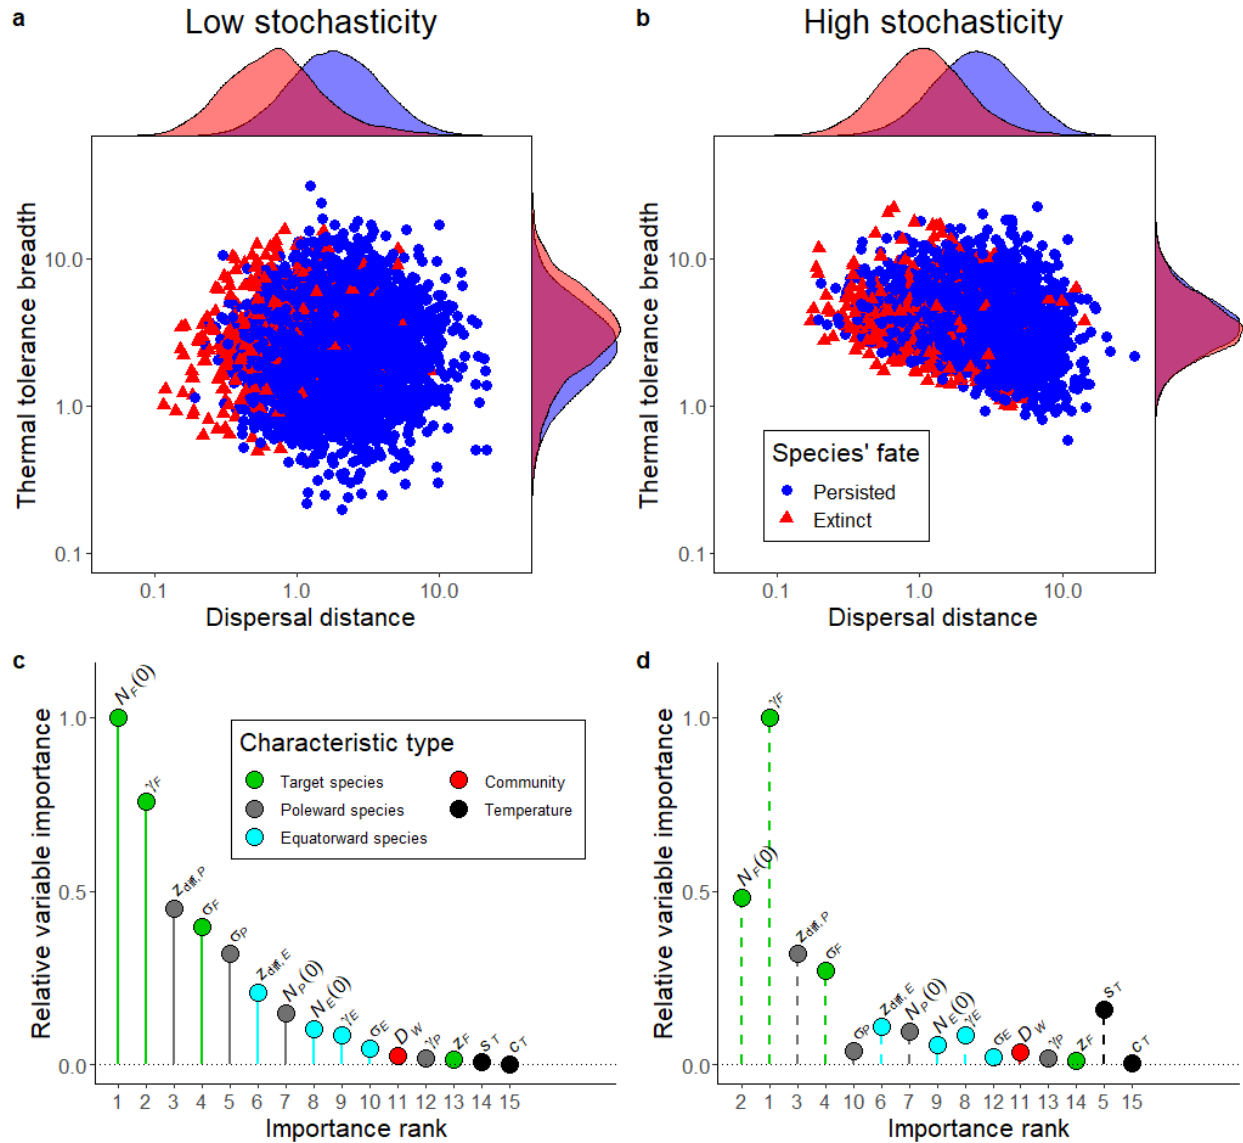

**Figure 2:** Species' persistence and the characteristics that predicted persistence varied with environmental stochasticity. (a,b) Each point shows the fate of a single species (triangle: extinction; circle: persistence) following climate change from a subset of unique simulations plotted over dispersal distance (horizontal axis) and thermal tolerance breadth (vertical axis). On the top and right of these plots are the marginal distributions of these parameters, separated by species' fate. Each axis is on a logarithmic scale. (c,d) Relative unscaled permutation importance of independent variables on species' persistence. Each characteristic is shaded depending on whether it is a characteristic of the species, its neighbors, the full community, or the environment. The horizontal axis shows the rank of the variable importance compared to other variables (1 being the most important), arranged in the same order for both plots. See Table 1 for definitions of symbols.

246 *With AM*

247 Under all scenarios, target species had a higher chance of persisting when relocating an  
248 intermediate fraction of the total population during AM (Fig. 3). Moreover, target species  
249 persistence was typically lower we relocating 100% of the total population than under no  
250 relocation (except when the target species was the shortest disperser). More often than not,  
251 AM involved multiple relocations (Fig. 4a-b) and higher AM success when relocating  
252 intermediate fractions required more individual relocation events (Fig. 4c-d). Assisted migration  
253 had little effect on the persistence of non-target species and final community diversity  
254 (Appendix S2), so the remaining results focus on persistence instead of invasion risk.

255 Of the possible target species, the shortest dispersers experienced the greatest benefit  
256 from AM (Fig. 3a-b). For most treatments, AM also increased persistence of target species with  
257 the lowest population sizes, species with the closest poleward neighbors, and randomly picked  
258 species. However, AM usually decreased persistence of species with the narrowest thermal  
259 tolerances (specialists).

260 Assisted migration had a similar effect on persistence regardless of how we estimated  
261 the species' thermal optimum (Fig. 3c-d). Under high stochasticity, AM was most successful  
262 with perfect knowledge of species' thermal optima, but under low stochasticity, AM was most  
263 successful with realized niche estimates. This difference suggests stronger competition in low-  
264 stochasticity environments such that competition set species limit more than species' inherent  
265 thermal tolerances.

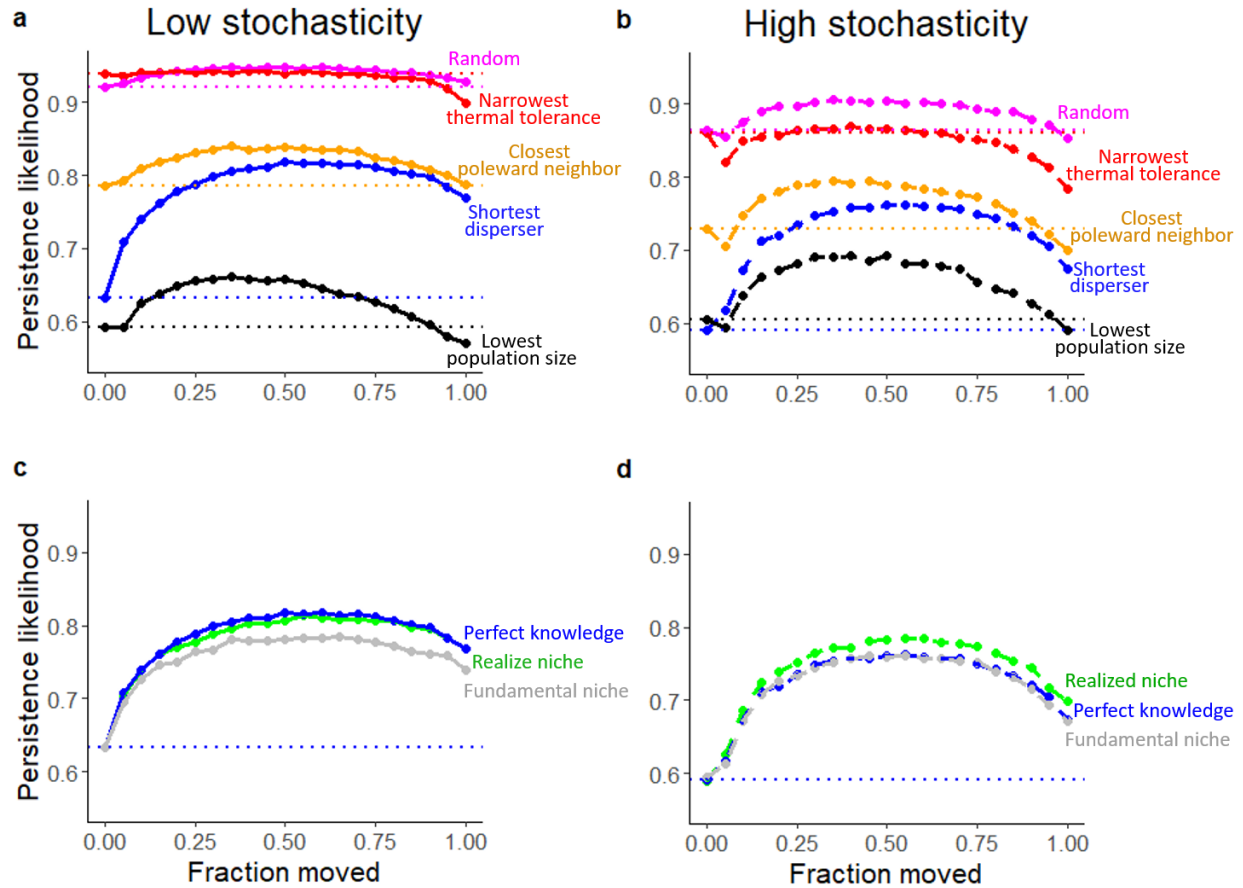

**Figure 3:** During climate change simulations, the persistence likelihood of a target species chosen for assisted migration (vertical axis) depended on the fraction of that population that was relocated (horizontal axis), and the level of environmental stochasticity (a,c: low, b,d: high). The dotted lines correspond to persistence with no management action and are shaded to match each comparison. (a,b) The effect of assisted migration on persistence with different types of target species chosen for relocation. The thermal optimum estimate used in each of these was the realized niche estimates (based on the species initial distribution). (c,d) The effect of assisted migration on persistence with different types of thermal optimum estimates. The target species in each of these simulations was the species with the shortest dispersal.



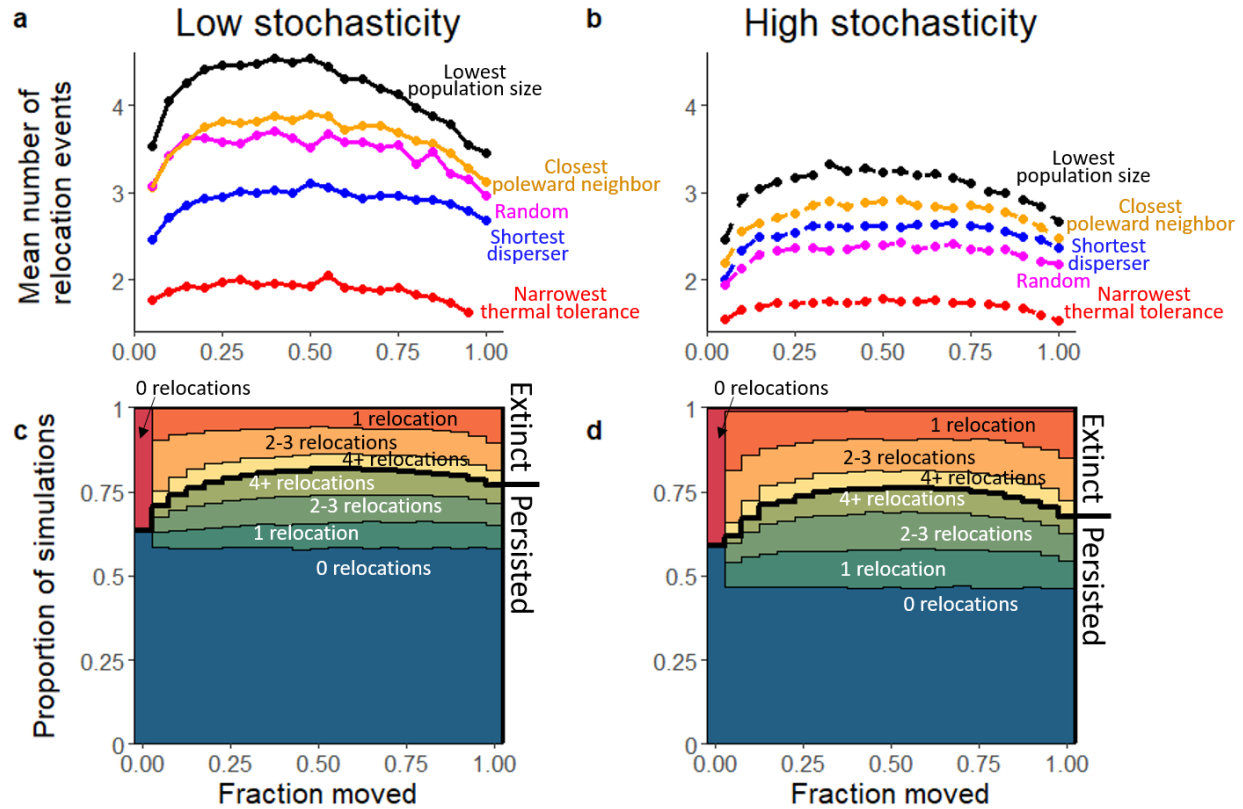

**Figure 4:** The number of independent relocation events that occurred during assisted migration simulations for low stochasticity (a,c) and high stochasticity (b,d) environments. (a,b) Among species that were relocated at least one time, the mean number of independent relocation events (vertical axis) that occurred under a range of values for the fraction of the population that was relocated each time (horizontal axis). The simulations shown here use the initial distribution (realized niche) estimate of the species' thermal optimum. (c,d) We categorized assisted migration simulations by fate of the species (persistence/extinction) and the number of independent relocation events that occurred over the course of the simulation. Here we show the proportion simulations that fall into these categories (shaded differently) depended on the fraction of the population moved during assisted migration (horizontal axis). The thick black line in each sub-figure separates simulations where the target species survives (below the line) and where it goes extinct (above the line). Simulations shown here use the shortest disperser as the target species and the initial distribution (realized niche) estimate of the species' thermal optimum.

266 For both levels of stochasticity, three of the top four most important variables for  
267 predicting AM success of the shortest disperser were the target species' initial population size  
268  $N_F(0)$ , the target species' thermal tolerance breadth  $\sigma_F$ , and the difference in thermal  
269 optimum between the target species and its poleward neighbor  $z_{diff,p}$ , based on random forest  
270 classifications (out-of bag error: 25.27% low stochasticity, 30.56% high stochasticity) (Fig. 5a-b).  
271 Assisted migration was most successful when the values of these characteristics were higher  
272 (Fig. 5c-e), suggesting that AM is most likely to benefit generalists with higher population sizes  
273 and less poleward competition. Under low stochasticity, AM was less successful if the poleward  
274 neighbor was a specialist with narrow thermal tolerance breadth  $\sigma_p$  (Fig. 5f), implying that  
275 poleward competition limited AM success under low stochasticity but not under high  
276 stochasticity. Assisted migration was also more successful when thermal optimum estimates  
277 were warmer than the true value (positive deviation of  $z_{est,dev}$ ) (Fig. 5g), and this effect was  
278 stronger under high stochasticity. Colder estimates placed target species further along the  
279 climate gradient, often beyond temperatures under which they can survive, so extreme year-to-  
280 year temperature change under high stochasticity would be more likely to drive the relocated  
281 population extinct if they are placed into the wrong location.

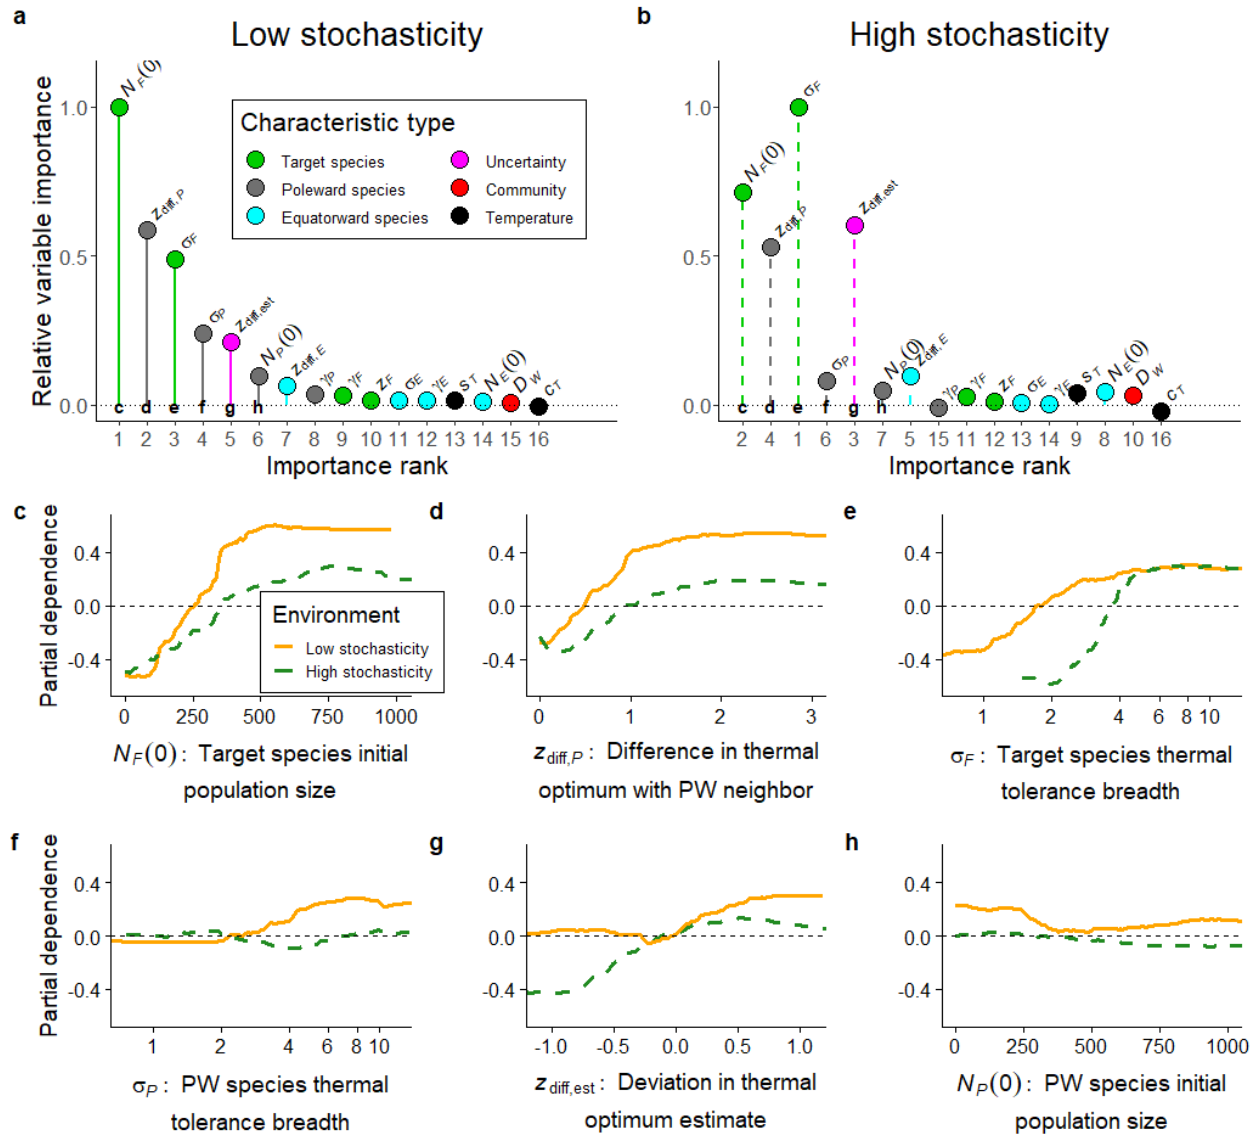

**Figure 5:** Importance of ecological characteristics from random forest classifications in determining whether assisted migration was successful for the target species (relocating 50% of the shortest dispersing species population with a realized niche estimate thermal optimum). (a,b) Relative unscaled permutation importance of independent variables of whether or not assisted migration improved species' persistence under low stochasticity (a) and high stochasticity (b). The horizontal axis shows the rank of the variable importance compared to other variables (1 being the most important), arranged in the same order for both plots. Each characteristic is shaded depending on whether it is a characteristic of the target species, its neighbors, the full community, the environment, or uncertainty around the thermal optimum estimate. (c-h) Partial dependence of the values of 6 independent variables (corresponding to the top 6 important variables for low stochasticity labeled in panel (a) and (b)) on whether or not assisted migration will increase the shortest disperser's persistence. The vertical axis is the log-odds of whether assisted migration increases persistence of a species (higher being more likely to persist). Solid lines represent the low stochasticity environment and dashed lines represent the high stochasticity environment. See Table 1 for definitions of symbols.

## 283 Discussion

284 Our model suggests that assisted migration (AM) can be effective at increasing species'  
285 persistence under climate change if the species is limited by short dispersal, small population  
286 sizes, and competition. However, like many related conservation translocations (Fischer &  
287 Lindenmayer 2000; Godefroid et al. 2011), we found that AM often fails when the relocated  
288 population does not establish, especially for narrow thermal tolerance species. Relocating an  
289 intermediate fraction of the population was consistently an optimal strategy (Fig. 3) because it  
290 allowed repeated AM events, compensating for potential establishment failures (Fig. 4).

### 291 *Choosing species for AM*

292 Species are vulnerable to climate change for a variety of reasons, ranging from  
293 dispersal-limitation (Pearson 2006), to narrow thermal tolerance (Tewksbury et al. 2008), to  
294 competitive interactions (Gilman et al. 2010; Urban et al. 2012). Our model suggests that the  
295 effectiveness of AM as a management strategy depends on the driver of vulnerability. In  
296 particular, AM might not be appropriate for specialist, narrow-tolerance species. Because  
297 specialist species usually persisted under climate change without AM (Fig. 2), narrow thermal  
298 tolerance was not a limiting factor for persistence in this model. This arises because of our  
299 assumption of a jack-of-all-trades-master-of-none (JATMN) trade-off (Levins 1968), where  
300 specialists had a high reproductive performance over a smaller range of temperatures. Because  
301 of this trade-off, specialists were stronger competitors under lottery competition (Chesson &  
302 Warner 1981), and this competitive advantage could outweigh any costs from narrow thermal  
303 tolerance. We also found that specialist species were less likely to benefit from AM (Fig. 3).

304 With only a narrow range of temperatures under which specialists can replace themselves, any  
305 error in identifying a species' optimal climate would disproportionately affect specialists.  
306 Removing the JATMN tradeoff would reduce specialists' competitiveness which could make  
307 them more vulnerable to climate change, but it would also weaken specialists' competitive  
308 ability, further limiting the effectiveness of AM.

309 Assisted migration was most successful for species that were dispersal limited because,  
310 in these cases, AM directly mitigated the driver of their vulnerability to climate change  
311 (McLachlan et al. 2007; Schwartz et al. 2012). Not only was short dispersal a strong predictor of  
312 extinction (Fig. 2), but the shortest dispersers also had the strongest proportional increase in  
313 persistence with AM (Fig. 3). Moreover, the shortest dispersers were the only target species  
314 that had increased persistence with every variation of AM that we modeled. We also found that  
315 species with low initial population sizes and species with close poleward competitors were also  
316 likely to be vulnerable to climate change and to benefit from AM (Fig. 3). These species had  
317 lower dispersal than the average species (Appendix S2), but they were likely to be strong AM  
318 candidates because of their other vulnerabilities (Gilman et al. 2010; Urban et al. 2012;  
319 Thompson & Gonzalez 2017). For example, species with low population sizes might be capable  
320 of dispersing far but not produce enough offspring to realize the full extent of their dispersal  
321 potential. For the case of species with close poleward neighbors, our analysis reveals that  
322 species interactions could identify target species for AM that might otherwise be overlooked.  
323 Overall, our results suggest that AM might be considered for conserving a variety of species  
324 beyond those that are directly dispersal limited.

325 Even under optimal conditions, AM did not prevent the extinction of nearly 20% of  
326 short-dispersing species (Fig. 3). For specialists, AM failed because suitable environments were  
327 sparse and narrow, but for other species, AM failed because they had a combination of  
328 characteristics that limited establishment success (such as a species with both short dispersal  
329 and narrow thermal tolerance) (Fig. 5). In these cases, managers might consider combining  
330 alternative management strategies, like increasing connectivity, removing barriers, or creating  
331 new reserves (Heller & Zavaleta 2009; Loss et al. 2011; Lawler & Olden 2011). For example,  
332 preparing the recipient ecosystem by controlling the populations of resident species (Godefroid  
333 et al. 2011) could limit competitive pressure, reduce the risk of establishment failure, and  
334 temporarily increase the realized niche of the relocated species. However, this approach would  
335 come with additional risks to resident species.

### 336 *Fractional relocation*

337 We found that AM was most successful when we relocated an intermediate fraction of  
338 the total population (typically around 50%; Fig. 3), as this increases robustness to uncertainty  
339 that could cause AM actions to fail. By leaving a fraction of the population to persist in the  
340 original location, this approach retains a source population for future conservation actions in  
341 case relocation occurs at the wrong time or into the wrong place. Fractional relocation also  
342 buffers against the risk of falsely identifying a target species for AM, in which case leaving some  
343 individuals behind could allow the species to recover those individuals that might be lost during  
344 AM. This contrasts with past AM models that assume the optimal strategy is to move the  
345 entirety of the total population, as the left-behind population would eventually go extinct  
346 without management (McDonald-Madden et al. 2011). Though relocating more individuals

347 should increase the chances that a species establishes (Godefroid et al. 2011; Blackburn et al.  
348 2015), this has diminishing returns when considering negative density dependence (Fischer &  
349 Lindenmayer 2000). Instead, relocating a fraction of a species would create two smaller  
350 populations, each with higher growth rates and less negative density dependence than a single  
351 unmanaged population. Though we account for the extinction risk of small populations through  
352 demographic and environmental stochasticity (Lande 1998), we do not include Allee effects or  
353 explicit genetic components that could cause inbreeding depression, which can further increase  
354 extinction risk of small populations (Gilpin & Soulé 1986).

355         Fractional relocation could also be robust to other risks that we did not directly model,  
356 such as the risk of invasion beyond competition (because we did not find invasion risk from  
357 competition alone; see below). Though fractional relocation relies largely on repeated  
358 translocations, which repeatedly expose the recipient ecosystem to potential invasion events  
359 (Kolar & Lodge 2001; Lockwood et al. 2005), intentionally relocating fewer individuals into a  
360 well-monitored ecosystem could also make it easier to detect and prevent invasions before  
361 they occur. Similarly, smaller releases could be easier to control if funding, planning, or societal  
362 opinions change and reversal is necessary (Haight et al. 2000).

### 363 *Community ecology of AM*

364         Our model builds on past research that suggests competition can prevent some species  
365 from tracking climate change (Urban et al. 2012). Though species were vulnerable to extinction  
366 if poleward species were strong competitors (Fig. 2), AM was also less successful when we  
367 relocated species into an area occupied by stronger competitors (Fig. 5). The effect of

368 competition was higher in competition-driven, low-stochasticity communities where AM  
369 success depended on characteristics of the poleward species than in dispersal-driven, high-  
370 stochasticity communities where success depended more on the ability to accurately place a  
371 species into its optimal climate (Fig. 5). This difference suggests that historical climate variability  
372 and community assembly can inform management decisions about AM. For example, limiting  
373 competitive interactions (Godefroid et al. 2011) might be more effective for species from  
374 environments with low historical variability, whereas relocating species into climate refugia  
375 (Morelli et al. 2016) might be more effective for species from environments with higher  
376 historical variability.

377         Despite concerns about the potential of AM to cause invasive species (Mueller &  
378 Hellmann 2008; Ricciardi & Simberloff 2009), we did not find evidence of invasions with our  
379 model (Appendix S2). However, we made several simplifications that could have limited the  
380 capacity for invasion to occur. First, the simple spatial structure of our model assumed a single  
381 contiguous community that assembled without distinct barriers, making the AM in our model  
382 analogous to intra-continental relocations that are less likely to cause invasions (Mueller &  
383 Hellmann 2008; Thomas 2011; Bellemare et al. 2017). Additionally, for the sake of simplicity,  
384 our model considered only intra-guild lottery competition without the wider web of species  
385 interactions that would naturally occur. Biological invasions usually involve more complex  
386 ecological dynamics, many of which are taxon-specific and difficult to generalize (Kolar & Lodge  
387 2001; Lockwood et al. 2005; Simberloff et al. 2013). Enemy-release effects would occur if  
388 relocated species escape antagonistic interactions that limits growth within their original range  
389 (Prenter et al. 2004). Also, relocated species might carry pathogens or parasites that spread to



390 other species in recipient community (Simler et al. 2018). A richer set of interactions could also  
391 complicate AM success, as relocating a species without a mutualist might limit establishment  
392 (Lunt et al. 2013; Plein et al. 2016). Also, novel interactions in the recipient ecosystem could  
393 counteract any physiological benefits the species would receive by reaching an optimal climate.  
394 Overall, while our simple competitive framework provides a first step toward exploring the  
395 uncertainties and community context of AM, a more complete set of interactions will be  
396 necessary to understand the full range of outcomes that could follow a relocation event, from  
397 establishment failure, to invasion, to the wide-scale restructuring of ecological communities  
398 that is already taking place with climate change (Alexander et al. 2015; Thompson & Gonzalez  
399 2017).

400

## 401 **Acknowledgments**

402 We would like to thank L. Bay, C. Clements, R. Gates, S. Harrison, C. Logan, M. McClure, C.  
403 Muhlfeld, S. Sawyer, M. Schwartz, R. Waples, and A. Whipple for their thoughtful conversations  
404 at the managed relocation workshop at UC Davis that informed this manuscript. This project  
405 was funded by the National Science Foundation, grant #1655475.

406

407

408

409

## 410 **References**

- 411 Alexander JM, Diez JM, Levine JM. 2015. Novel competitors shape species responses to climate  
412 change. *Nature* **525**:515-518.
- 413 Bellemare J, Connolly B, Sax DF. 2017. Climate change, managed relocation, and the risk of  
414 intra-continental plant invasions: A theoretical and empirical exploration relative to the  
415 flora of New England. *Rhodora* **119**:73-109.
- 416 Bellis J, Bourke D, Williams C, Dalrymple S. 2019. Identifying factors associated with the success  
417 and failure of terrestrial insect translocations. *Biological Conservation* **236**:29-36.
- 418 Blackburn TM, Lockwood JL, Cassey P. 2015. The influence of numbers on invasion success.  
419 *Molecular Ecology* **24**:1942–1953.
- 420 Boiffin J, Badeau V, Bréda N. 2017. Species distribution models may misdirect assisted  
421 migration: Insights from the introduction of Douglas-fir to Europe. *Ecological*  
422 *Applications* **27**:446-457.
- 423 Case TJ, Holt RD, McPeck MA, Keitt TH. 2005. The community context of species borders:  
424 Ecological and evolutionary perspectives. *Oikos* **108**:28-46.
- 425 Chauvenet A, Ewen J, Armstrong D, Blackburn T, Pettorelli N. 2013. Maximizing the success of  
426 assisted colonizations. *Animal Conservation* **16**:161-169.
- 427 Chesson PL, Warner RR. 1981. Environmental variability promotes coexistence in lottery  
428 competitive systems. *The American Naturalist* **117**:923-943.
- 429 Davis AJ, Jenkinson LS, Lawton JH, Shorrocks B, Wood S. 1998. Making mistakes when  
430 predicting shifts in species range in response to global warming. *Nature* **391**:783-786.
- 431 Fischer J, Lindenmayer DB. 2000. An assessment of the published results of animal relocations.
- 432 Gilman SE, Urban MC, Tewksbury J, Gilchrist GW, Holt RD. 2010. A framework for community  
433 interactions under climate change. *Trends in Ecology & Evolution* **25**(6):325-331.
- 434 Gilpin ME, Soulé ME. 1986. Minimum viable populations: processes of species extinction. Pages  
435 19-34 in Soulé MEm editor. *Conservation Biology: The Science of Scarcity and Diversity*.  
436 Sinauer Associates, Sunderland, Massachusetts.
- 437 GISTEMP (GISS Surface Temperature Analysis) Team. 2019. NASA Goddard Institute for Space  
438 Studies. Available from: <https://data.giss.nasa.gov/gistemp/> (accessed April 2019).
- 439 Godefroid S et al. 2011. How successful are plant species reintroductions? *Biological*  
440 *Conservation* **144**:672-682.
- 441 Haight RG, Ralls K, Starfield AM. 2000. Designing species translocation strategies when  
442 population growth and future funding are uncertain. *Conservation Biology* **14**:1298-  
443 1307.

- 444 Lenssen N, Schmidt G, Hansen J, Menne M, Persin A, Ruedy R, Zyss D. 2019. Improvements in  
445 the GISTEMP uncertainty model. *Journal of Geophysical Research: Atmospheres*  
446 **124**:6307-6326.
- 447 Heller NE, Zavaleta ES. 2009. Biodiversity management in the face of climate change: A review  
448 of 22 years of recommendations. *Biological Conservation* **142**:14-32.
- 449 Hewitt N, Klenk N, Smith AL, Bazely DR, Yan N, Wood S, MacLellan JI, Lipsig-Mumme C,  
450 Henriques I. 2011. Taking stock of the assisted migration debate. *Biological Conservation*  
451 **144**:2560-2572.
- 452 IPCC (Intergovernmental Panel on Climate Change). 2014. *Climate Change 2014*. IPCC, Geneva.
- 453 Javeline D, Hellmann JJ, McLachlan JS, Sax DF, Schwartz MW, Cornejo RC. 2015. Expert opinion  
454 on extinction risk and climate change adaptation for biodiversity. *Elementa: Science of*  
455 *the Anthropocene* **3**:000057.
- 456 Kling DM, Sanchirico JN, Wilen JE. 2016. Bioeconomics of managed relocation. *Journal of the*  
457 *Association of Environmental and Resource Economists* **3**:1023-1059.
- 458 Kolar CS, Lodge DM. 2001. Progress in invasion biology: Predicting invaders. *Trends in Ecology &*  
459 *Evolution* **16**:199-204.
- 460 Lande R. 1998. Demographic stochasticity and Allee effect on a scale with isotropic noise. *Oikos*  
461 **83**:353-358.
- 462 Lawler JJ, Olden JD. 2011. Reframing the debate over assisted colonization. *Frontiers in Ecology*  
463 *and the Environment* **9**:569-574.
- 464 Levins R. 1968. *Evolution in Changing Environments: Some Theoretical Explorations*. Princeton  
465 University Press, Princeton.
- 466 Lockwood JL, Cassey P, Blackburn T. 2005. The role of propagule pressure in explaining species  
467 invasions. *Trends in Ecology & Evolution* **20**:223-228.
- 468 Loss SR, Terwilliger LA, Peterson AC. 2011. Assisted colonization: Integrating conservation  
469 strategies in the face of climate change. *Biological Conservation* **144**:92-100.
- 470 Lunt ID, et al. 2013. Using assisted colonisation to conserve biodiversity and restore ecosystem  
471 function under climate change. *Biological Conservation* **157**:172-177.
- 472 McDonald-Madden E, Baxter PW, Possingham HP. 2008. Making robust decisions for  
473 conservation with restricted money and knowledge. *Journal of Applied Ecology* **45**:1630-  
474 1638.
- 475 McDonald-Madden E, Runge MC, Possingham HP, Martin TG. 2011. Optimal timing for  
476 managed relocation of species faced with climate change. *Nature Climate Change* **1**:261-  
477 265.
- 478 McLachlan JS, Hellmann JJ, Schwartz MW. 2007. A framework for debate of assisted migration  
479 in an era of climate change. *Conservation Biology* **21**:297-302.

- 480 Melbourne BA, Hastings AH. 2008. Extinction risk depends strongly on factors contributing to  
481 stochasticity. *Nature* **454**:100-103.
- 482 Morelli TL, et al. 2016. Managing climate change refugia for climate adaptation. *PLoS One*  
483 **11**:e0159909.
- 484 Mueller JM, Hellmann JJ. 2008. An assessment of invasion risk from assisted migration.  
485 *Conservation Biology* **22**:562-567.
- 486 Neubert MG, Caswell H. 2000. Demography and dispersal: Calculation and sensitivity analysis of  
487 invasion speed for structured populations. *Ecology* **81**:1613-1628.
- 488 Norberg J. 2004. Biodiversity and ecosystem functioning: A complex adaptive systems  
489 approach. *Limnology and Oceanography* **490**:1269-1277.
- 490 Parmesan C. 2006. Ecological and evolutionary responses to recent climate change. *Annual*  
491 *Review of Ecology Evolution, and Systematics* **37**:637-669.
- 492 Pearson RG. 2006. Climate change and the migration capacity of species. *Trends in Ecology &*  
493 *Evolution* **21**:111-113.
- 494 Plein M, Bode M, Moir ML, Vesk PA. 2016. Translocation strategies for multiple species depend  
495 on interspecific interaction type. *Ecological Applications* **26**:1186-1197.
- 496 Prenter J, MacNeil C, Dick JT, Dunn AM. 2004. Roles of parasites in animal invasions. *Trends in*  
497 *Ecology & Evolution* **19**:385-390.
- 498 Regan HM, Ben-Haim Y, Langford B, Wilson WG, Lundberg P, Andelman SJ, Burgman MA. 2005.  
499 Robust decision-making under severe uncertainty for conservation management.  
500 *Ecological Applications* **15**:1471-1477.
- 501 Ricciardi A, Simberloff D. 2009. Assisted colonization is not a viable conservation strategy.  
502 *Trends in Ecology & Evolution* **24**:248-253.
- 503 Rout TM, McDonald-Madden E, Martin TG, Mitchell NJ, Possingham HP, Armstrong DP. 2013.  
504 How to decide whether to move species threatened by climate change. *PLOS ONE*  
505 **8**:e75814.
- 506 Sale PF. 1978. Coexistence of coral reef fishes: A lottery for living space. *Environmental Biology*  
507 *of Fishes* **3**:85-102.
- 508 Schwartz MW, et al. 2012. Managed relocation: Integrating the scientific, regulatory, and  
509 ethical challenges. *BioScience* **62**:732-743.
- 510 Seddon PJ, Moro D, Mitchell NJ, Chauvenet AL, Mawson PR. 2015. Proactive conservation or  
511 planned invasion? Past, current and future use of assisted colonisation. Pages 105-236  
512 in Armstrong DP, Hayward MW, Moro D, Seddon PJ, editors. *Advances in Reintroduction*  
513 *Biology of Australian and New Zealand Fauna*. CSIRO Publishing, Victoria.
- 514 Simberloff D et al. 2013. Impacts of biological invasions: What's what and the way forward?  
515 *Trends in Ecology & Evolution* **28**:58-66.

- 516 Simler AB, Williamson MA, Schwartz MW, Rizzo DM. 2018. Amplifying plant disease risk through  
517 assisted migration. *Conservation Letters* **12**:e12605.
- 518 St-Laurent GP, Hagerman S, Kozak R. 2018. What risks matter? Public views about assisted  
519 migration and other climate-adaptive reforestation strategies. *Climatic Change* **151**:573-  
520 587.
- 521 Tewksbury JJ, Huey RB, Deutsch CA. 2008. Putting the heat on tropical animals. *Science*  
522 **320**:1296-1297.
- 523 Thomas CD. 2011. Translocation of species, climate change, and the end of trying to recreate  
524 past ecological communities. *Trends in Ecology & Evolution* **26**:216-221.
- 525 Thompson PL, Gonzalez A. 2017. Dispersal governs the reorganization of ecological networks  
526 under environmental change. *Nature Ecology & Evolution* **1**:0162.
- 527 Urban MC. 2015. Accelerating extinction risk from climate change. *Science* **348**:571-573.
- 528 Urban MC, Tewksbury JS, Sheldon KS. 2012. On a collision course: Competition and dispersal  
529 differences create no-analogue communities and cause extinctions during climate  
530 change. *Proceedings of the Royal Society B* **279**:2072-2080.
- 531 Vasseur DA, DeLong JP, Gilbert B, Greig HS, Harley CD, McCann KS, Savage V, Tunney TD,  
532 O'Connor MI. 2014. Increased temperature variation poses a greater risk to species than  
533 climate warming. *Proceedings of the Royal Society B* **281**:20132612.
- 534 Wichmann MC, Johst K, Schwager M, Blasius B, Jeltsch F. 2005. Extinction risk, coloured noise  
535 and the scaling of variance. *Theoretical Population Biology* **88**:29-40.
- 536 Wolf CM, Griffith B, Reed C, Temple SA. 1996. Avian and mammalian translocations: Update  
537 and reanalysis of 1987 survey data. *Conservation Biology* **10**:1142-1154.

## 538 **Appendix S1: Supplementary methods**

### 539 *Double geometric distribution*

540 In continuous space models of species dispersal, ecologists often use a Laplace or  
541 double exponential distribution kernels (Kot et al. 1996; Neubert & Caswell 2000; Urban et al.  
542 2012). This is largely because a Laplace distribution is leptokurtic, or has “fat-tails” compared to  
543 a standard Gaussian kernel. These fat tails give some individuals a higher chance of dispersing  
544 extremely far from their origin, which may explain how some slow-dispersing species could  
545 track rapidly changing climates in the past (Clark et al. 1998). Because these rare long dispersal  
546 events could play an important role in how dispersal-limited species could track climate change  
547 in our model, we used a discrete-space leptokurtic dispersal kernel.

548 Just as the Laplace distribution is a “double exponential” distribution, we considered  
549 dispersal kernel that would be a “double geometric” distribution. In other words, this kernel  
550 resembles a geometric distribution moving away from 0 in both the positive and negative  
551 directions. This kernel is defined by one parameter  $q_i$ , the probability of a propagule remaining  
552 in any particular patch (besides the origin). Each propagule either stays at its origin with  
553 probability  $\frac{q_i}{2-q_i}$  or moves one space in the pole-ward or equator-ward direction, each with  
554 equal probability  $\frac{1-q_i}{2-q_i}$ . Then each propagule either stays at that current patch with probability  $q_i$   
555 or continues to move one space in the same direction with probability  $1 - q_i$ . This process  
556 continues until the propagule stays. The probability that a propagule disperses from patch  $x$  to  
557 path  $y$  is then,

$$k_i(x, y) = \left( \frac{q_i}{2 - q_i} \right) (1 - q_i)^{|x-y|}. \quad (1)$$

558 Using this probability mass function, we can determine the mean dispersal distance of a  
 559 propagule,  $\gamma_i$ , as the mean absolute value of a random variable  $y \sim k_i(x, y)$ . That is

$$\begin{aligned} E[Y] &= \sum_{y=-\infty}^{\infty} |x - y| k_i(x, y) \\ &= \sum_{y=-\infty}^{\infty} |x - y| \left( \frac{q_i}{2 - q_i} \right) (1 - q_i)^{|x-y|} \\ &= \left( \frac{1}{2 - q_i} \right) \left[ \sum_{y=-\infty}^{x-1} |x - y| q_i (1 - q_i)^{|x-y|} + 0 + \sum_{y=x+1}^{\infty} |x - y| q_i (1 - q_i)^{|x-y|} \right] \\ &= 2 \left( \frac{1}{2 - q_i} \right) \sum_{y=0}^{\infty} y q_i (1 - q_i)^y \\ &= \frac{2(1 - q_i)}{q_i(2 - q_i)}. \end{aligned} \quad (2)$$

### 560 *Low population threshold*

561 As we implemented a reactive approach to assisted migration, we had to determine a  
 562 threshold population below which the population would be relocated. Deciding on appropriate  
 563 thresholds required us to weigh certain management priorities. If these thresholds were too  
 564 low, there would likely be only a narrow time window in which managers could react to  
 565 population decline and relocate the population before extinction. Alternatively, if thresholds  
 566 are too high, managers might relocate species that are temporarily in decline but not at risk of

567 extinction, risking management funds and effort while potentially creating some extinction risk  
568 during an inappropriate relocation.

569 To find a threshold that balanced these priorities, we analyzed time series of population  
570 sizes in the  $2^{16}$  high stochasticity simulations in which no management actions were taken. We  
571 considered a range of potential population size thresholds from 1 to 100. For each species, if  
572 the population fell below the threshold, we determined whether or not the population went  
573 extinct following the first instance it fell below the threshold. Those that fell below this  
574 threshold but did not go extinct were false positives. Those that fell below the threshold and  
575 went extinct in less than 5 time steps were true positives, but impractical to relocate before  
576 extinction. Those that fell below the threshold and went extinct in more than 5 but less than 10  
577 time steps were true positives that were practical for relocation. The maximum percentage of  
578 practical true positives occurred with a threshold of population size of  $\eta = 42$  (Figure S1.1),  
579 which we used as the low population threshold throughout our AM simulations.

## 580 *References*

- 581 Clark JS et al. 1998. Reid's paradox of rapid plant migration: Dispersal theory and interpretation  
582 of paleoecological records. *BioScience* **48**:13–24.
- 583 Kot M, Lewis MA, van den Driessche P. 1996. Dispersal data and the spread of invading  
584 organisms. *Ecology* **77**:2027–2042.
- 585 Neubert MG, Caswell H. 2000. Demography and dispersal: Calculation and sensitivity analysis of  
586 invasion speed for structured populations. *Ecology* **81**:1613–1628.
- 587 Urban MC, Tewksbury JS, Sheldon KS. 2012. On a collision course: Competition and dispersal  
588 differences create no-analogue communities and cause extinctions during climate  
589 change. *Proceedings of the Royal Society B* **279**:2072–2080



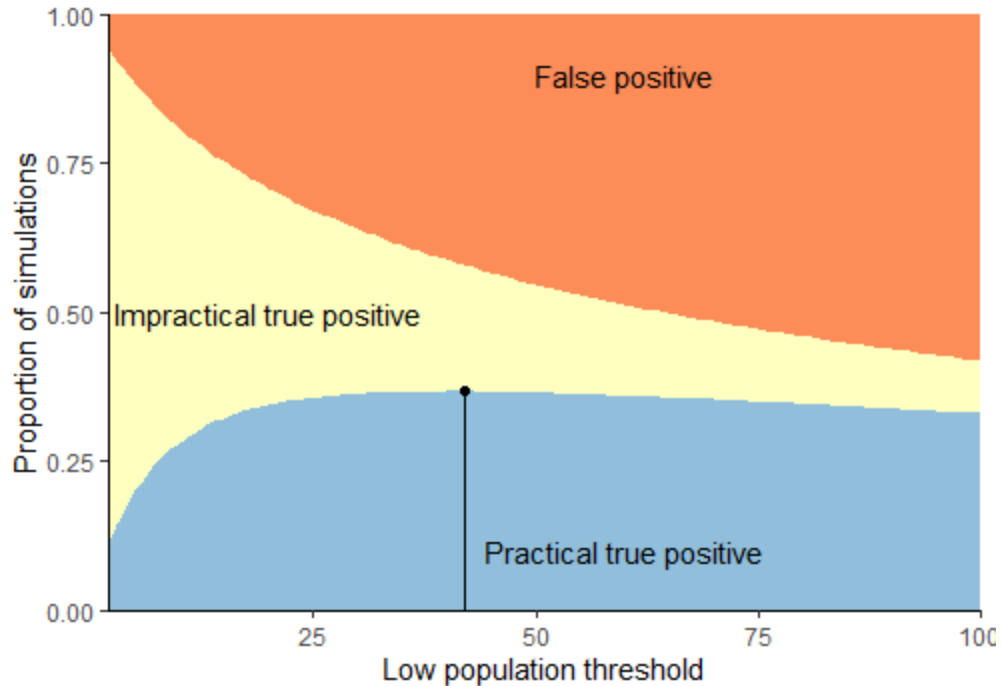

590

591 **Figure S1.1:** When simulated under climate change without assisted migration, species fell into three  
592 categories (shaded) depending on their fate following the first time they fell below a low population  
593 threshold. We compared threshold values to determine when we could detect a species was likely to go  
594 extinct, but with enough time to take management action to prevent that extinction. “False positive”  
595 species continued to persist until the end of the simulation. “Impractical true positive” species went  
596 extinct within 5 time steps. “Practical true positive” species went extinct in more than 5 time steps but  
597 less than 10 time steps. The threshold value that optimizes the percentage of practical true positives  
598 (42) is marked by the vertical line.

599 **Appendix S2: Supplementary tables and figures**

600 **Table S2.1:** Mean value of characteristic values for different types of target species relative to  
 601 mean values from randomly chosen species in both low and high stochasticity environments.

| Target              | Shortest $\gamma_F$ |      | Narrowest $\sigma_F$ |      | Lowest $N_F(0)$ |      | Closest $Z_{\text{diff},P}$ |      |
|---------------------|---------------------|------|----------------------|------|-----------------|------|-----------------------------|------|
| Stochasticity       | Low                 | High | Low                  | High | Low             | High | Low                         | High |
| $Z_F$               | 1.00                | 1.01 | 1.00                 | 1.00 | 1.00            | 1.01 | 1.00                        | 0.99 |
| $\gamma_F$          | 0.22                | 0.27 | 1.06                 | 1.48 | 0.85            | 0.83 | 0.90                        | 0.97 |
| $\sigma_F$          | 0.98                | 1.10 | 0.28                 | 0.47 | 1.49            | 1.24 | 0.92                        | 0.99 |
| $N_F(0)$            | 0.85                | 0.84 | 0.88                 | 0.99 | 0.29            | 0.39 | 0.73                        | 0.77 |
| $Z_{\text{diff},P}$ | 0.98                | 1.01 | 0.86                 | 0.99 | 0.70            | 0.73 | 0.17                        | 0.28 |
| $Z_{\text{diff},E}$ | 0.97                | 1.01 | 0.85                 | 0.99 | 0.74            | 0.77 | 1.19                        | 1.19 |

602

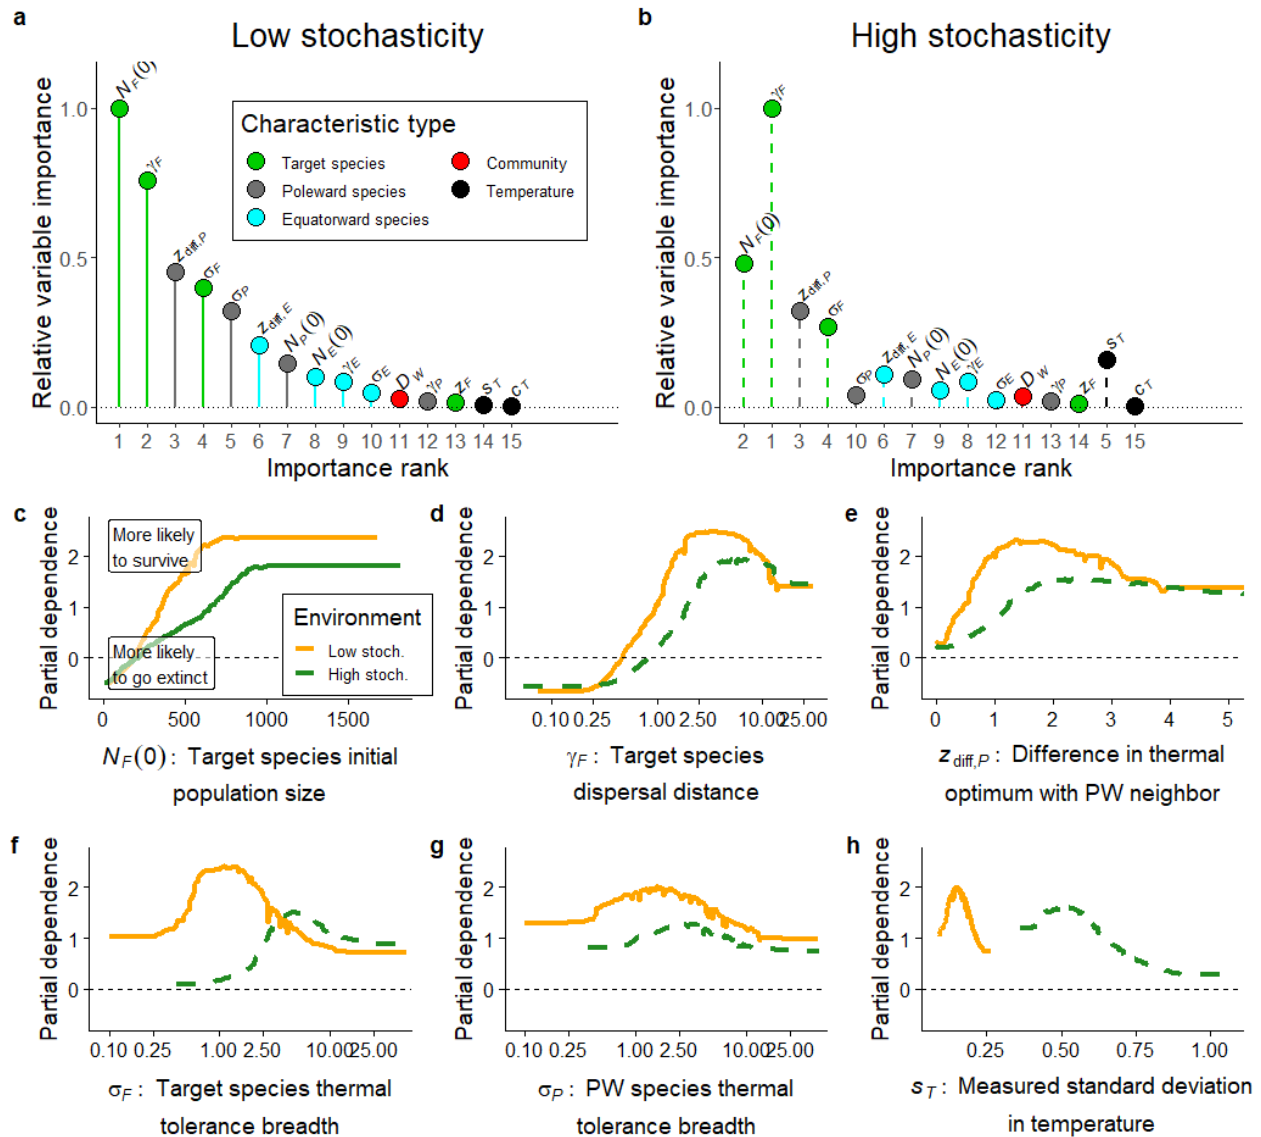

603  
 604 **Figure S2.1:** Importance of species, community, and environmental characteristics in determining  
 605 whether the target species will persist with climate change without assisted migration. (a,b) Relative  
 606 unscaled permutation importance of independent variables of whether a species persisted through  
 607 climate change with no management under low stochasticity (a) and high stochasticity (b). The  
 608 horizontal axis shows the rank of the variable importance compared to other variables (1 being the most  
 609 important), arranged in the same order for both plots. Each characteristic is shaded depending on  
 610 whether it is a characteristic of the target species, its neighbors, the full community, the environment,  
 611 or uncertainty around the thermal optimum estimate. (c-h) Partial dependence of the values of 6  
 612 independent variables (corresponding to the top 6 important variables for low stochasticity labeled in  
 613 panel (a) and (b)) on whether or not assisted migration will increase the shortest disperser's persistence.  
 614 The vertical axis is the log-odds of whether a species persisted (higher being more likely to persist). Solid  
 615 lines represent the low stochasticity environment and dashed lines represent the high stochasticity  
 616 environment. See Table 1 for definitions of symbols.

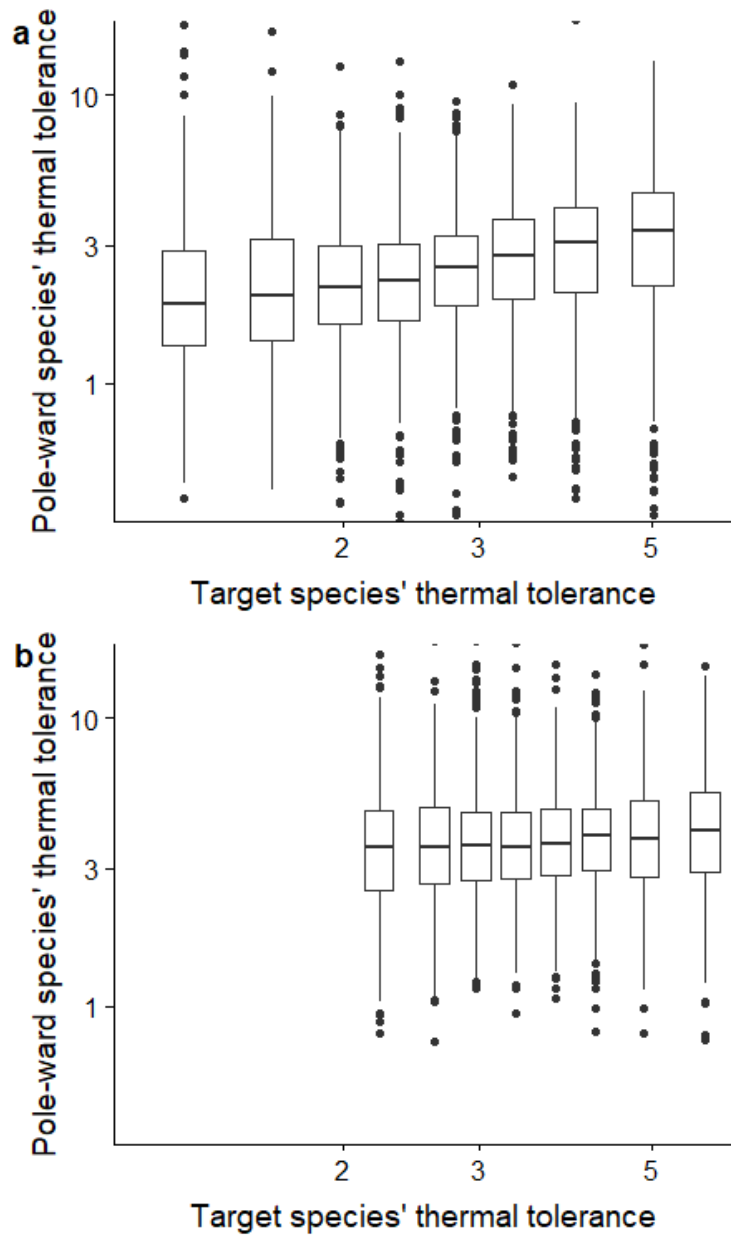

617

618 **Figure S2.2:** Comparison of the thermal tolerances of target that went extinct during simulations  
619 without assisted migration and with the species on their pole-ward side (a) under low stochasticity and  
620 (b) under high stochasticity. Target species are grouped into 10% quantiles of their thermal tolerances  
621 with the bottom and top quantiles removed to limit the scale of the figure. Among these species that  
622 went extinct, those with higher thermal tolerances had pole-ward neighbors with higher thermal  
623 tolerance, with a stronger relationship in lower stochasticity environments.

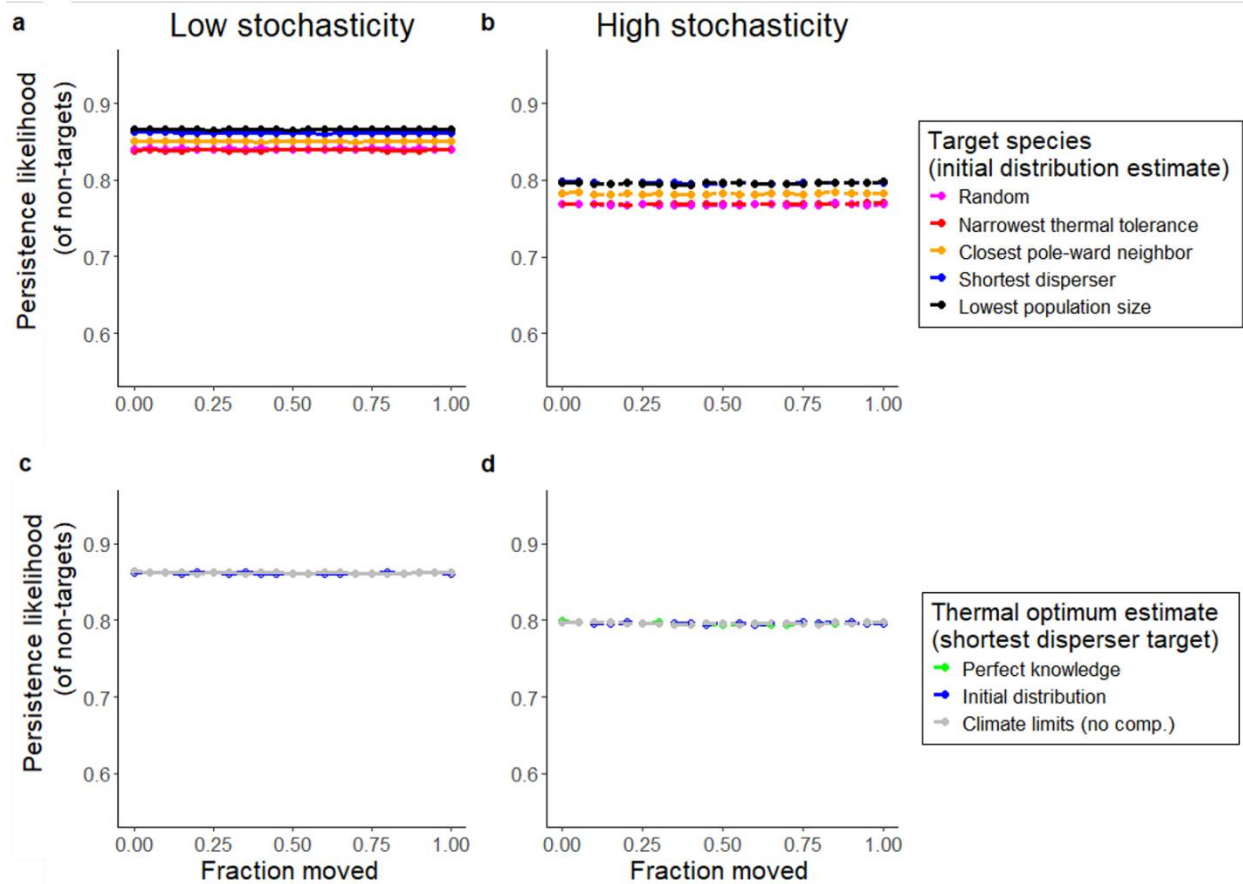

624  
625 **Figure S2.3:** During climate change simulations, the persistence likelihood of non-target species that  
626 were not chosen for assisted migration (vertical axis) did not depend on the fraction of that population  
627 that was relocated (horizontal axis). The dotted lines correspond to persistence with no management  
628 action and are shaded to match each comparison. (a,b) The effect of assisted migration on non-target  
629 species' persistence with different types of target species chosen for relocation. The thermal optimum  
630 estimate used in each of these was the realized niche estimates (based on the species initial  
631 distribution). (c,d) The effect of assisted migration on non-target species' persistence with different  
632 types of thermal optimum estimates. The target species in each of these simulations was the species  
633 with the shortest dispersal.

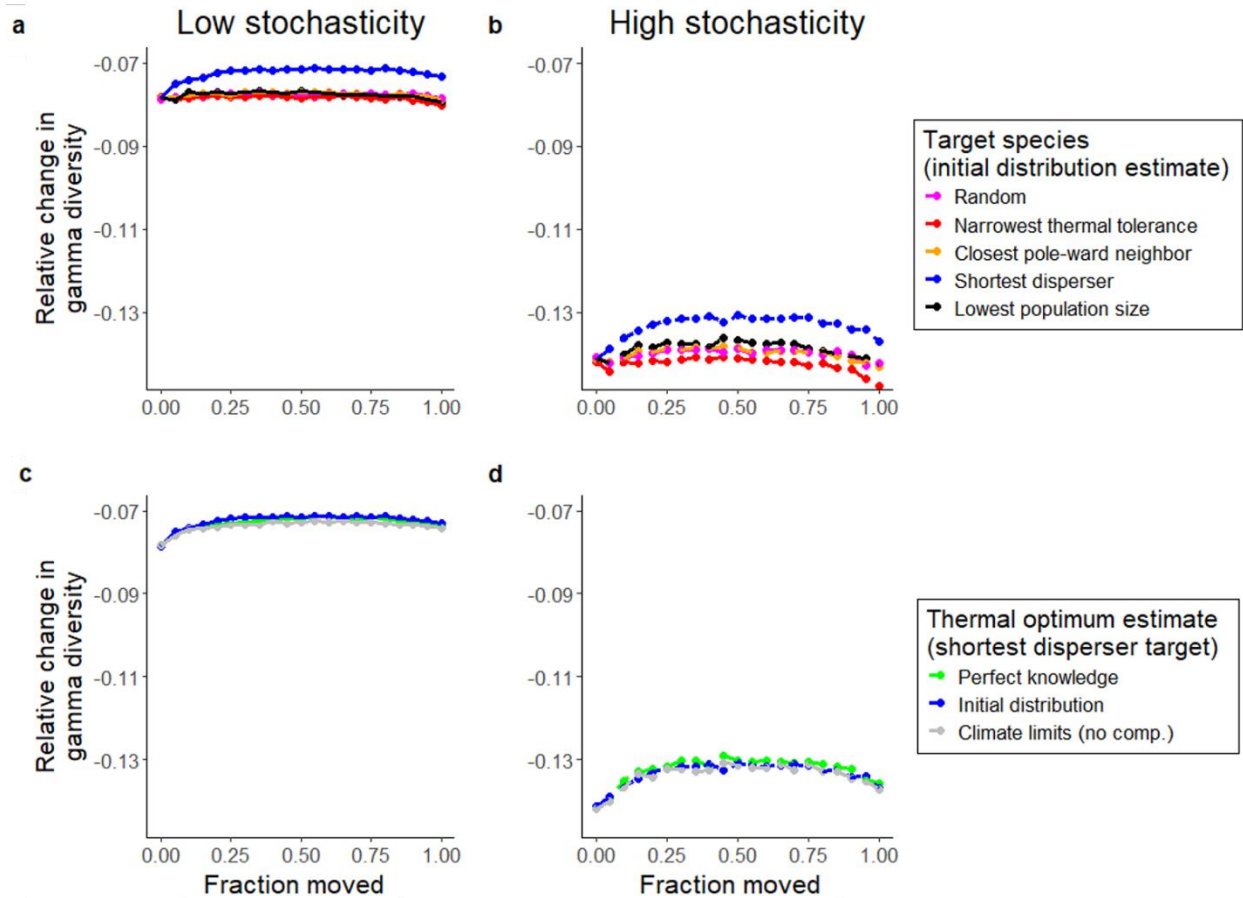

634

635 **Figure S2.4:** During climate change simulations, the relative change in gamma inverse Simpson's  
636 diversity index (vertical axis) depended on the fraction of the target population that was relocated  
637 (horizontal axis). The dotted lines correspond to gamma diversity with no management action and are  
638 shaded to match each comparison. (a,b) The effect of assisted migration on gamma diversity with  
639 different types of target species chosen for relocation. The thermal optimum estimate used in each of  
640 these was the realized niche estimates (based on the species initial distribution). (c,d) The effect of  
641 assisted migration on gamma diversity with different types of thermal optimum estimates. The target  
642 species in each of these simulations was the species with the shortest dispersal.

643 **Appendix S3: R code**

644 Sample R code can be accessed at: <https://figshare.com/s/3325b51ed75d159e035e>
